# Supplementary material
Source: publisher site journal article supplement (https://www.spandidos-publications.com/8703/downloadSupplementary)
Supplement: Supplementary file 1 [file downloadSupplementary]

Table SI.  $\Delta\Delta C_q$  values of several oncogenes.

| Gene                               | CTL-1 | CTL-2 | CTL-3 | K+1   | K+2   | K+3   | AgNP-1 | AgNP-2 | AgNP-3 |
|------------------------------------|-------|-------|-------|-------|-------|-------|--------|--------|--------|
| <i>GAPDH</i>                       | 18.35 | 18.34 | 18.32 | 17.27 | 17.28 | 17.26 | 17.49  | 17.49  | 17.52  |
| <i>MYC</i>                         | 14.54 | 14.44 | 14.32 | 14.58 | 14.98 | 14.77 | 14.32  | 14.60  | 14.46  |
| <i>CCND1</i>                       | 17.69 | 17.92 | 17.82 | 21.50 | 22.11 | 20.84 | 20.00  | 20.10  | 20.04  |
| <i>HER-2</i>                       | 23.69 | 23.47 | 23.56 | 27.92 | 27.97 | 28.30 | 24.54  | 24.45  | 24.36  |
| <i>PTGS2</i><br>(encodesC<br>OX-2) | 23.55 | 24.23 | 24.92 | 23.06 | 23.00 | 23.06 | 28.18  | 28.88  | 28.53  |
| <i>CTNND1</i>                      | 20.31 | 20.57 | 20.44 | 23.98 | 24.34 | 24.20 | 22.12  | 22.19  | 22.06  |

*GAPDH*, glyceraldehyde 3-phosphate dehydrogenase; *MYC*, c-Myc; *CCND1*, cyclin D1; *HER-2*, human epidermal growth factor receptor-2; *PTGS2*, prostaglandin-endoperoxide synthase 2; COX-2, cyclooxygenase-2; *CTNND1*, catenin delta-1.

Table SII.  $\Delta\Delta C_q$  values of several apoptotic-related genes.

| Gene                             | CTL-1 | CTL-2 | CTL-3 | AgNP-1 | AgNP-2 | AgNP-3 |
|----------------------------------|-------|-------|-------|--------|--------|--------|
| <i>ACTB</i>                      | 9.68  | 9.54  | 9.36  | 9.30   | 9.70   | 9.81   |
| <i>TP53</i>                      | 17.16 | 17.01 | 16.73 | 15.25  | 15.93  | 15.78  |
| <i>BAX</i>                       | 20.13 | 19.78 | 19.70 | 18.46  | 18.37  | 17.77  |
| <i>BBC3</i><br>(encodes<br>PUMA) | 20.84 | 20.40 | 20.35 | 24.89  | 25.49  | 25.09  |
| <i>BCL2</i>                      | 22.95 | 22.31 | 22.69 | 22.67  | 21.73  | 21.97  |

*ACTB*, actin- $\beta$ ; *TP53*, tumor protein P53; *BAX*, BCL2 associated X; *BBC3/PUMA*, BCL2 binding component 3; *BCL2*, B-cell lymphoma 2.
